# Supplementary material
Source: PubMed Central journal article supplement (PMC7526819)
Supplement: AAC.02571-19-s0001.pdf [file AAC.02571-19-s0001.pdf]

1. Comparison of competing models
2. Goodness of fit
3. Regression diagnostics
4. Bootstrapped model
5. Model excluding haemodialysis patients

### 1 .Comparison of competing models.

| Table 1. Comparison between competing models. |                                |                                |                                        |                   |                     |       |
|-----------------------------------------------|--------------------------------|--------------------------------|----------------------------------------|-------------------|---------------------|-------|
|                                               |                                |                                |                                        |                   | -2 Log - likelihood | AIC   |
| fT>MI<br>C ><br>60%                           | AKI                            | Modified<br>APACH<br>E II ≥ 14 | AKI *<br>Modified<br>APACHE<br>II ≥ 14 | Immunosuppression | 53.87               | 65.87 |
| fT>MI<br>C ><br>60%                           | AKI                            | Modified<br>APACH<br>E II ≥ 14 | AKI *<br>Modified<br>APACHE<br>II ≥ 14 | WBC               | 54.96               | 66.96 |
| fT>MI<br>C ><br>60%                           | AKI                            | Modified<br>APACH<br>E II ≥ 14 | AKI *<br>Modified<br>APACHE<br>II ≥ 14 |                   | 55.07               | 65.06 |
| fT>MI<br>C ><br>60%                           | AKI                            | Modified<br>APACH<br>E II ≥ 14 |                                        |                   | 58.9                | 66.9  |
| fT>MI<br>C ><br>60%                           | Modified<br>APACH<br>E II ≥ 14 |                                |                                        |                   | 64.81               | 70.81 |
| fT>MI<br>C ><br>60%                           | AKI                            |                                |                                        |                   | 61.27               | 67.27 |

### 2.Goodness of fit

The goodness of fit of the final model (Table 4 in the manuscript ) was tested using Hosmer and Lemeshow test. The Chi-square of Hosmer and Lemeshow

test was 3.975 on 4 degrees of freedom and  $P=0.409$ , suggesting that the model fits the data. (Table 2)

Table 2: Contingency Table for Hosmer and Lemeshow Test

|   | in-hospital survival=0 |          | in-hospital survival = 1 |          | Total |
|---|------------------------|----------|--------------------------|----------|-------|
|   | Observed               | Expected | Observed                 | Expected |       |
| 1 | 4                      | 4.304    | 3                        | 2.696    | 7     |
| 2 | 4                      | 2.981    | 2                        | 3.019    | 6     |
| 3 | 3                      | 2.696    | 6                        | 6.304    | 9     |
| 4 | 0                      | 1.019    | 9                        | 7.981    | 9     |
| 5 | 2                      | 2.715    | 25                       | 24.285   | 27    |
| 6 | 1                      | .285     | 19                       | 19.715   | 20    |

**3. Regression diagnostics:** Diagnostic tests were produced using the "car" package in R. Outlier test showed no Studentized residuals with Bonferroni  $p < 0.05$ .

Influential points analysis suggested two influential points (Table 3, subjects 2 and 60)

| Table 3 – Influential points analysis |                       |           |               |
|---------------------------------------|-----------------------|-----------|---------------|
|                                       | Studentized residuals | Hat value | Cook Distance |
| 1                                     | -2.215                | 0.033     | 0.065         |
| 2*                                    | -3.085                | 0.014     | 0.204         |

|      |         |       |       |
|------|---------|-------|-------|
| 7    | -1.3113 | 0.25  | 0.088 |
| 10   | -1.3113 | 0.25  | 0.088 |
| 60** | 1.886   | 0.161 | 0.151 |

Table 4 shows the refitted logistic regression model coefficients after the exclusion of influential points.

| Table 4- Comparison of coefficients (log domain) between original model and two models with subtracted potentially influential points |                |       |                                                        |       |                                                           |       |
|---------------------------------------------------------------------------------------------------------------------------------------|----------------|-------|--------------------------------------------------------|-------|-----------------------------------------------------------|-------|
|                                                                                                                                       | Original model |       | *Model subtracting first influential point (subject 2) |       | **Model subtracting second influential point (subject 60) |       |
|                                                                                                                                       | Coefficient    | S.E   | Coefficient                                            | S.E   | Coefficient                                               | S.E   |
| ft>MIC > 60%                                                                                                                          | 2.046          | 0.901 | 2.781                                                  | 1.168 | 3.004                                                     | 1.172 |
| AKI                                                                                                                                   | -4.24          | 1.42  | -4.92                                                  | 1.61  | -5.57                                                     | 1.68  |
| Modified APACHE II ≥ 14                                                                                                               | -2.178         | 0.918 | -2.368                                                 | 0.963 | -2.86                                                     | 1.053 |
| AKI * Modified APACHE II ≥ 14                                                                                                         | 3.03           | 1.55  | 2.96                                                   | 1.56  | 3.89                                                      | 1.65  |
| S.E, standard error.                                                                                                                  |                |       |                                                        |       |                                                           |       |

#### 4. Bootstrap analysis

| Table 5. Logistic regression model with 20000 bootstrap replicates (log domain) method = percentile |             |                |        |
|-----------------------------------------------------------------------------------------------------|-------------|----------------|--------|
|                                                                                                     | Coefficient | 95% Confidence |        |
| ft>MIC > 60%                                                                                        | 2.2337 *    | 0.322          | 21.708 |
| AKI                                                                                                 | -4.6199     | -42.148        | 13.499 |
| Modified APACHE II ≥ 14                                                                             | -2.318 *    | -21.178        | -0.030 |
| AKI * Modified APACHE II ≥ 14                                                                       | 3.3108      | -15.649        | 24.166 |
| *p<0.05                                                                                             |             |                |        |

| Table 6. Bootstrapped logistic regression model for survival (20000 repetitions) method=percentile |       |          |          |          |
|----------------------------------------------------------------------------------------------------|-------|----------|----------|----------|
|                                                                                                    | OR    | 95% CI   |          | BootBias |
| ft>MIC > 60%                                                                                       | 9.33* | 1.379    | 2.68E+09 | 18.77075 |
| AKI                                                                                                | 0.01  | 4.96E-19 | 728687.3 | 0.021344 |
| Modified APACHE II ≥ 14                                                                            | 0.97* | 2.81E-10 | 0.970446 | 0.352748 |

|                                       |       |         |          |          |
|---------------------------------------|-------|---------|----------|----------|
| AKI * Modified<br>APACHE II $\geq$ 14 | 27.39 | 1.6E-07 | 6.35E-10 | 4.504154 |
|---------------------------------------|-------|---------|----------|----------|

The mean OR for  $fT > MIC > 60\%$  was 28, the median OR was 9.33,  $p < 0.05$

### 5. Model excluding haemodialysis patients

Table 7 shows the refitted logistic regression model coefficients after excluding hemodialysis patients (5 patients)

| Table 7- Original logistic regression model coefficients (log domain) and refitted logistic regression model coefficients (log domain) |                |       |                                       |       |  |  |
|----------------------------------------------------------------------------------------------------------------------------------------|----------------|-------|---------------------------------------|-------|--|--|
|                                                                                                                                        | Original model |       | Model excluding hemodialysis patients |       |  |  |
|                                                                                                                                        | Coefficient    | S.E   | Coefficient                           | S.E   |  |  |
| $fT > MIC > 60\%$                                                                                                                      | 2.046 *        | 0.901 | 2.213 *                               | 0.934 |  |  |
| AKI                                                                                                                                    | -4.24 **       | 1.42  | -4.302**                              | 1.45  |  |  |
| Modified<br>APACHE II $\geq$ 14                                                                                                        | -2.178 *       | 0.918 | -2.479 *                              | 0.969 |  |  |
| AKI * Modified<br>APACHE II $\geq$ 14                                                                                                  | 3.03           | 1.55  | 3.348 *                               | 1.591 |  |  |
| S.E, standard error. * $p < 0.05$ , ** $p < 0.01$ , *** $p < 0.001$                                                                    |                |       |                                       |       |  |  |
